# Supplementary material
Source: PubMed Central journal article supplement (PMC5444521)
Supplement: NIHMS72373-supplement-Suppl__Table_1.pdf [file NIHMS72373-supplement-Suppl__Table_1.pdf]

Suppl Table 1. Dengue IgG (MIA) and neutralizing (Neut.) responses by serotype.

|       | Dengue IgG n (%)   |        |                    |        |                    |               |                    |        |                    |        |                    |               |                    |        |                    |        |                    |               |                    |        | Dengue Neut. n (%) |        |           |               |    |        |   |        |           |               |    |        |
|-------|--------------------|--------|--------------------|--------|--------------------|---------------|--------------------|--------|--------------------|--------|--------------------|---------------|--------------------|--------|--------------------|--------|--------------------|---------------|--------------------|--------|--------------------|--------|-----------|---------------|----|--------|---|--------|-----------|---------------|----|--------|
|       | GBS <sup>a</sup>   |        |                    |        | GBS <sup>b</sup>   |               |                    |        | GBS <sup>c</sup>   |        |                    |               | CTR1               |        |                    |        | CTR2               |               |                    |        |                    |        |           |               |    |        |   |        |           |               |    |        |
|       | IgG Z <sup>-</sup> |        | IgG Z <sup>+</sup> |        | IgG Z <sup>-</sup> |               | IgG Z <sup>+</sup> |        | IgG Z <sup>-</sup> |        | IgG Z <sup>+</sup> |               | IgG Z <sup>-</sup> |        | IgG Z <sup>+</sup> |        | IgG Z <sup>-</sup> |               | IgG Z <sup>+</sup> |        |                    |        |           |               |    |        |   |        |           |               |    |        |
| D1234 | 6                  | (33.3) | 18                 | (75.0) | <b>24</b>          | <b>(57.1)</b> | 4                  | (28.6) | 17                 | (60.7) | <b>21</b>          | <b>(50.0)</b> | 5                  | (38.4) | 9                  | (31.0) | <b>14</b>          | <b>(33.3)</b> | 23                 | (31.5) | 16                 | (64.0) | <b>39</b> | <b>(39.8)</b> | 10 | (15.4) | 2 | (40.0) | <b>12</b> | <b>(17.1)</b> | 35 | (85.4) |
| D134  | 4                  | (22.2) | 3                  | (12.5) | <b>7</b>           | <b>(16.7)</b> | 3                  | (21.5) | 7                  | (25.0) | <b>10</b>          | <b>(23.8)</b> | 4                  | (30.8) | 7                  | (24.2) | <b>11</b>          | <b>(26.2)</b> | 7                  | (9.6)  | 4                  | (16.0) | <b>11</b> | <b>(11.2)</b> | 8  | (12.3) | 0 | -      | <b>8</b>  | <b>(11.4)</b> | 1  | (2.4)  |
| D124  | 1                  | (5.6)  | 1                  | (4.2)  | <b>2</b>           | <b>(4.8)</b>  | -                  | -      | -                  | -      | <b>0</b>           |               | 0                  | -      | 0                  | -      | <b>0</b>           |               | 2                  | (2.7)  | 1                  | (4.0)  | <b>3</b>  | <b>(3.1)</b>  | 2  | (3.1)  | 1 | (20.0) | <b>3</b>  | <b>(4.3)</b>  | 0  | -      |
| D234  | -                  | -      | -                  | -      | <b>0</b>           |               | -                  | -      | -                  | -      | <b>0</b>           |               | 0                  | -      | 0                  | -      | <b>0</b>           |               | 1                  | (1.4)  | 0                  | -      | <b>1</b>  | <b>(1.0)</b>  | 0  | -      | 0 | -      | <b>0</b>  |               | 5  | (12.2) |
| D14   | 2                  | (9.0)  | 1                  | (4.2)  | <b>3</b>           | <b>(7.1)</b>  | 2                  | (14.3) | 2                  | (7.1)  | <b>4</b>           | <b>(9.5)</b>  | 2                  | (15.4) | 5                  | (17.2) | <b>7</b>           | <b>(16.7)</b> | 5                  | (6.8)  | 2                  | (8.0)  | <b>7</b>  | <b>(7.1)</b>  | 13 | (20.0) | 0 | -      | <b>13</b> | <b>(18.6)</b> | 0  | -      |
| D13   | 1                  | (5.6)  | 1                  | (4.2)  | <b>2</b>           | <b>(4.8)</b>  | 2                  | (14.3) | 1                  | (3.6)  | <b>3</b>           | <b>(7.1)</b>  | 0                  | -      | 4                  | (13.8) | <b>4</b>           | <b>(9.5)</b>  | 4                  | (5.5)  | 0                  | -      | <b>4</b>  | <b>(4.1)</b>  | 7  | (10.8) | 1 | (20.0) | <b>8</b>  | <b>(11.4)</b> | 0  | -      |
| D12   | 1                  | (5.6)  | -                  | -      | <b>1</b>           | <b>(2.4)</b>  | 1                  | (7.1)  | -                  | -      | <b>1</b>           | <b>(2.4)</b>  | 0                  | -      | 0                  | -      | <b>0</b>           |               | 0                  | -      | 0                  | -      | <b>0</b>  |               | 0  | -      | 0 | -      | <b>0</b>  |               | 0  | -      |
| D34   | -                  | -      | -                  | -      | <b>0</b>           |               | -                  | -      | -                  | -      | <b>0</b>           |               | 0                  | -      | 0                  | -      | <b>0</b>           |               | 0                  | -      | 0                  | -      | <b>0</b>  |               | 2  | (3.1)  | 0 | -      | <b>2</b>  | <b>(2.9)</b>  | 0  | -      |
| D1    | 3                  | (6.0)  | -                  | -      | <b>3</b>           | <b>(7.1)</b>  | 1                  | (7.1)  | 1                  | (3.6)  | <b>2</b>           | <b>(4.8)</b>  | 0                  | -      | 4                  | (13.8) | <b>4</b>           | <b>(9.5)</b>  | 15                 | (20.5) | 2                  | (8.0)  | <b>17</b> | <b>(17.3)</b> | 8  | (12.3) | 1 | (20.0) | <b>9</b>  | <b>(12.9)</b> | 0  | -      |
| D2    | -                  | -      | -                  | -      | <b>0</b>           |               | -                  | -      | -                  | -      | <b>0</b>           |               | 0                  | -      | 0                  | -      | <b>0</b>           |               | 1                  | (1.4)  | 0                  | -      | <b>1</b>  | <b>(1.0)</b>  | 0  | -      | 0 | -      | <b>0</b>  |               | 0  | -      |
| D3    | -                  | -      | -                  | -      | <b>0</b>           |               | -                  | -      | -                  | -      | <b>0</b>           |               | 0                  | -      | 0                  | -      | <b>0</b>           |               | 0                  | -      | 0                  | -      | <b>0</b>  |               | 2  | (3.1)  | 0 | -      | <b>2</b>  | <b>(2.9)</b>  | 0  | -      |
| D4    | -                  | -      | -                  | -      | <b>0</b>           |               | -                  | -      | -                  | -      | <b>0</b>           |               | 0                  | -      | 0                  | -      | <b>0</b>           |               | 4                  | (5.5)  | 0                  | -      | <b>4</b>  | <b>(4.1)</b>  | 1  | (1.5)  | 0 | -      | <b>1</b>  | <b>(1.4)</b>  | 0  | -      |
| D Neg | -                  | -      | -                  | -      | <b>0</b>           |               | 1                  | (7.1)  | -                  | -      | <b>1</b>           | <b>(2.4)</b>  | 2                  | (15.4) | 0                  | -      | <b>2</b>           | <b>(4.8)</b>  | 11                 | (15.1) | 0                  | -      | <b>11</b> | <b>(11.2)</b> | 12 | (18.4) | 0 | -      | <b>12</b> | <b>(17.1)</b> | 0  | -      |
|       | 18                 |        | 24                 |        | <b>42</b>          |               | 14                 |        | 28                 |        | <b>42</b>          |               | 13                 |        | 29                 |        | <b>42</b>          |               | 73                 |        | 25                 |        | <b>98</b> |               | 65 |        | 5 |        | <b>70</b> |               | 41 |        |

<sup>a</sup>GBS first sample; <sup>b</sup>GBS intermediate sample; <sup>c</sup>GBS last sample.

Sensitivity and specificity of positivity thresholds for dengue and Zika IgG detection by MIA. These Specificity and Sensitivity values were calculated by GraphPad Prism 6 software based on the analysis of Receiver-Operator Characteristic (ROC) curves obtained for each antigen tested on a set of negative and positive controls.

|             | D1   | D2    | D3     | D4   | ZIK    |
|-------------|------|-------|--------|------|--------|
| Sensitivity | 100% | 90%   | 80.95% | 100% | 82.72% |
| Specificity | 100% | 98.8% | 100%   | 100% | 92.11% |
