# Supplementary material
Source: PubMed Central journal article supplement (PMC5444521)
Supplement: NIHMS72373-supplement-Suppl__Table_2.pdf [file NIHMS72373-supplement-Suppl__Table_2.pdf]

Suppl. Table 2. Zika and Dengue IgG (MIA) and neutralizing (Neut) responses.

| Patient | Zika and Dengue IgG |     |     |     |     |                     |     |     |     |     |             |     |     |     |     | Zika and Dengue Neut <sup>a</sup> |       |       |       |       |
|---------|---------------------|-----|-----|-----|-----|---------------------|-----|-----|-----|-----|-------------|-----|-----|-----|-----|-----------------------------------|-------|-------|-------|-------|
|         | First sample        |     |     |     |     | Intermediate sample |     |     |     |     | Last sample |     |     |     |     | (Last sample)                     |       |       |       |       |
|         | ZIKA                | D1  | D2  | D3  | D4  | ZIKA                | D1  | D2  | D3  | D4  | ZIKA        | D1  | D2  | D3  | D4  | ZIKA                              | D1    | D2    | D3    | D4    |
| GB1     | POS                 | POS | NEG | POS | POS | POS                 | POS | NEG | POS | POS | POS         | POS | NEG | POS | NEG | 320                               | 640   | 40    | 80    | 20    |
| GB2     | NEG                 | POS | NEG | POS | POS | POS                 | POS | NEG | POS | NEG | POS         | POS | NEG | NEG | NEG | 80                                | 320   | 640   | 80    | 40    |
| GB3     | NEG                 | POS | NEG | POS | POS | NEG                 | POS | NEG | POS | NEG | POS         | POS | NEG | POS | NEG | 320                               | 1280+ | 1280+ | 320   | 160   |
| GB4     | POS                 | POS | POS | POS | POS | POS                 | POS | POS | POS | POS | POS         | POS | NEG | NEG | POS | 320                               | 640   | 320   | 320   | 80    |
| GB5     | POS                 | POS | NEG | POS | NEG | POS                 | POS | POS | POS | POS | POS         | POS | POS | POS | POS | 1280+                             | ND    | ND    | ND    | ND    |
| GB6     | POS                 | POS | POS | POS | POS | POS                 | POS | POS | POS | POS | POS         | POS | NEG | NEG | POS | 320                               | 320   | 80    | 40    | 20    |
| GB7     | POS                 | POS | POS | POS | POS | POS                 | POS | POS | POS | POS | POS         | POS | POS | POS | POS | 80                                | 320   | 160   | 40    | 0     |
| GB8     | POS                 | POS | POS | POS | POS | POS                 | POS | POS | POS | POS | POS         | POS | POS | POS | POS | 80                                | 640   | 640   | 80    | 320   |
| GB9     | NEG                 | POS | POS | POS | POS | POS                 | POS | POS | POS | POS | POS         | POS | POS | POS | POS | 80                                | 1280+ | 160   | 160   | 80    |
| GB10    | NEG                 | POS | POS | POS | POS | NEG                 | POS | POS | POS | POS | POS         | POS | POS | POS | POS | 160                               | 1280+ | 640   | 160   | 160   |
| GB11    | POS                 | POS | POS | POS | POS | POS                 | POS | POS | POS | POS | POS         | POS | NEG | POS | POS | 160                               | 1280+ | 320   | 80    | 80    |
| GB12    | POS                 | POS | POS | POS | POS | POS                 | POS | POS | POS | POS | POS         | POS | NEG | POS | POS | 80                                | 160   | 320   | 80    | 80    |
| GB13    | POS                 | POS | POS | NEG | POS | POS                 | POS | NEG | POS | POS | POS         | POS | NEG | POS | POS | 160                               | 320   | 640   | 80    | 80    |
| GB14    | NEG                 | POS | POS | POS | POS | POS                 | POS | POS | POS | POS | POS         | POS | NEG | POS | POS | 160                               | 320   | 320   | 80    | 160   |
| GB15    | POS                 | POS | NEG | POS | POS | NEG                 | POS | NEG | POS | POS | POS         | POS | NEG | POS | POS | 160                               | 320   | 320   | 40    | 160   |
| GB16    | NEG                 | POS | POS | POS | POS | NEG                 | POS | POS | POS | POS | POS         | POS | NEG | POS | POS | 160                               | 320   | 320   | 160   | 80    |
| GB17    | NEG                 | POS | NEG | POS | POS | NEG                 | POS | NEG | POS | POS | POS         | POS | NEG | POS | POS | 320                               | 640   | 640   | 640   | 320   |
| GB18    | NEG                 | POS | POS | NEG | NEG | NEG                 | POS | POS | NEG | NEG | NEG         | NEG | NEG | NEG | NEG | 320                               | 160   | 640   | 80    | 40    |
| GB19    | POS                 | POS | POS | POS | POS | POS                 | POS | NEG | NEG | POS | POS         | POS | NEG | NEG | POS | 320                               | 640   | 160   | 80    | 40    |
| GB20    | NEG                 | POS | POS | POS | POS | POS                 | POS | NEG | POS | POS | POS         | POS | NEG | POS | POS | 160                               | 320   | 640   | 160   | 80    |
| GB21    | NEG                 | POS | NEG | NEG | NEG | NEG                 | NEG | NEG | NEG | NEG | NEG         | NEG | NEG | NEG | NEG | 160                               | 160   | 320   | 80    | 80    |
| GB22    | POS                 | POS | POS | POS | POS | POS                 | POS | POS | POS | POS | POS         | POS | NEG | NEG | NEG | 640                               | 320   | 160   | 160   | 20    |
| GB23    | POS                 | POS | POS | POS | POS | POS                 | POS | POS | POS | POS | POS         | POS | POS | POS | POS | 640                               | 1280+ | 320   | 640   | 40    |
| GB24    | NEG                 | POS | NEG | NEG | POS | NEG                 | POS | POS | POS | POS | POS         | POS | NEG | POS | POS | 640                               | 1280+ | 640   | 640   | 320   |
| GB25    | POS                 | POS | POS | POS | POS | POS                 | POS | POS | POS | POS | POS         | POS | NEG | POS | POS | 160                               | 640   | 160   | 320   | 320   |
| GB26    | NEG                 | POS | NEG | NEG | NEG | NEG                 | POS | NEG | NEG | NEG | NEG         | NEG | NEG | NEG | NEG | 160                               | 640   | 320   | 320   | 160   |
| GB27    | POS                 | POS | POS | POS | POS | POS                 | POS | POS | POS | POS | POS         | POS | POS | POS | POS | 1280+                             | 1280+ | 1280+ | 1280+ | 640   |
| GB28    | NEG                 | POS | POS | NEG | POS | NEG                 | POS | NEG | NEG | POS | POS         | POS | NEG | NEG | POS | 160                               | 640   | 320   | 320   | 160   |
| GB29    | POS                 | POS | NEG | POS | POS | POS                 | POS | NEG | POS | POS | POS         | POS | NEG | POS | NEG | 640                               | 1280+ | 640   | 1280+ | 20    |
| GB30    | NEG                 | POS | NEG | POS | NEG | NEG                 | POS | NEG | POS | NEG | POS         | POS | NEG | POS | NEG | 320                               | 1280+ | 160   | 1280+ | 320   |
| GB31    | POS                 | POS | POS | POS | POS | POS                 | POS | POS | POS | POS | POS         | POS | NEG | POS | POS | 160                               | 640   | 640   | 640   | 80    |
| GB32    | POS                 | POS | POS | POS | POS | NEG                 | POS | POS | POS | POS | POS         | POS | NEG | POS | POS | 160                               | 160   | 320   | 160   | 80    |
| GB33    | POS                 | POS | NEG | NEG | POS | POS                 | POS | NEG | NEG | POS | POS         | POS | NEG | NEG | POS | 640                               | 160   | 80    | 160   | 80    |
| GB34    | POS                 | POS | POS | POS | POS | POS                 | POS | POS | POS | POS | POS         | POS | NEG | NEG | POS | 320                               | 160   | 10    | 80    | 160   |
| GB35    | POS                 | POS | POS | POS | POS | POS                 | POS | NEG | POS | POS | POS         | POS | POS | POS | POS | 640                               | 320   | 40    | 160   | 40    |
| GB36    | POS                 | POS | POS | POS | POS | POS                 | POS | NEG | POS | POS | POS         | POS | NEG | POS | POS | 640                               | 1280+ | 320   | 1280+ | 160   |
| GB37    | NEG                 | POS | NEG | NEG | NEG | POS                 | POS | NEG | NEG | NEG | NEG         | NEG | NEG | NEG | NEG | 1280+                             | 1280+ | 1280+ | 1280+ | 80    |
| GB38    | NEG                 | POS | POS | POS | POS | POS                 | POS | POS | POS | POS | POS         | POS | NEG | POS | POS | 320                               | 160   | 160   | 160   | 320   |
| GB39    | NEG                 | POS | NEG | POS | POS | NEG                 | POS | NEG | POS | POS | POS         | POS | NEG | POS | POS | 640                               | 1280+ | 1280+ | 1280+ | 1280+ |
| GB40    | POS                 | POS | POS | POS | POS | POS                 | POS | POS | POS | POS | POS         | POS | POS | POS | POS | 1280+                             | 1280+ | 80    | 320   | 160   |
| GB41    | POS                 | POS | POS | POS | POS | POS                 | POS | NEG | POS | POS | POS         | POS | NEG | POS | POS | 640                               | 1280+ | 640   | 640   | 160   |
| GB42    | NEG                 | POS | NEG | NEG | POS | NEG                 | POS | NEG | NEG | POS | POS         | POS | NEG | NEG | POS | 640                               | 1280+ | 1280+ | 1280+ | 1280+ |
| POS     | 24                  | 42  | 27  | 33  | 36  | 28                  | 41  | 22  | 34  | 35  | 29          | 40  | 14  | 29  | 32  | 42                                | 41    | 40    | 41    | 36    |
| NEG     | 18                  | 0   | 15  | 9   | 6   | 14                  | 0   | 0   | 0   | 0   | 13          | 0   | 0   | 0   | 0   | 0                                 | 0     | 1     | 0     | 5     |

<sup>a</sup>Neutralization titres were considered as positive if  $\geq 40$
