# Supplementary material
Source: PubMed Central journal article supplement (PMC5444521)
Supplement: NIHMS72373-supplement-Suppl__Table_3.pdf [file NIHMS72373-supplement-Suppl__Table_3.pdf]

Suppl. Table 3. Percentage of binding against glycolipids in serum of patients at admission (n=42) and at 3 months (n31).

| Patient | At admission |      |     |      |      |      | At 3 months |      |     |      |      |      |
|---------|--------------|------|-----|------|------|------|-------------|------|-----|------|------|------|
|         | GM1          | GA1  | GM2 | GD1a | GD1b | GQ1b | GM1         | GA1  | GM2 | GD1a | GD1b | GQ1b |
| 1       | NEG          | 72%  | 38% | NEG  | NEG  | NEG  |             |      |     |      |      |      |
| 2       | NEG          | 35%  | NEG | NEG  | NEG  | NEG  | NEG         | 54%  | NEG | NEG  | NEG  | NEG  |
| 3       | NEG          | 48%  | NEG | NEG  | NEG  | NEG  | 51%         | 56%  | NEG | 82%  | 53%  | NEG  |
| 4       | NEG          | 71%  | 59% | 119% | 107% | NEG  | 141%        | 46%  | 54% | 136% | 162% | NEG  |
| 5       | NEG          | NEG  | NEG | NEG  | NEG  | NEG  |             |      |     |      |      |      |
| 6       | NEG          | 79%  | NEG | NEG  | NEG  | NEG  |             |      |     |      |      |      |
| 7       | NEG          | 72%  | 44% | NEG  | NEG  | NEG  | 78%         | 55%  | NEG | 83%  | 90%  | NEG  |
| 8       | NEG          | NEG  | NEG | NEG  | NEG  | NEG  |             |      |     |      |      |      |
| 9       | NEG          | NEG  | NEG | 44%  | NEG  | NEG  | 46%         | NEG  | NEG | 58%  | 60%  | NEG  |
| 10      | NEG          | NEG  | NEG | NEG  | NEG  | NEG  | NEG         | NEG  | NEG | NEG  | NEG  | NEG  |
| 11      | NEG          | 45%  | NEG | NEG  | NEG  | NEG  | NEG         | 70%  | NEG | NEG  | NEG  | NEG  |
| 12      | NEG          | NEG  | NEG | NEG  | NEG  | NEG  | 57%         | 41%  | 42% | 67%  | 77%  | NEG  |
| 13      | NEG          | NEG  | NEG | NEG  | NEG  | NEG  | NEG         | NEG  | NEG | NEG  | NEG  | NEG  |
| 14      | NEG          | NEG  | 48% | NEG  | 57%  | NEG  | NEG         | NEG  | NEG | NEG  | NEG  | NEG  |
| 15      | NEG          | 45%  | 58% | 83%  | 51%  | NEG  | 52%         | 60%  | NEG | 66%  | 60%  | NEG  |
| 16      | NEG          | NEG  | NEG | 49%  | NEG  | NEG  | NEG         | NEG  | NEG | NEG  | NEG  | NEG  |
| 17      | NEG          | NEG  | NEG | 55%  | NEG  | NEG  | NEG         | NEG  | NEG | NEG  | NEG  | NEG  |
| 18      | NEG          | NEG  | NEG | NEG  | NEG  | NEG  | NEG         | NEG  | NEG | NEG  | NEG  | NEG  |
| 19      | NEG          | NEG  | NEG | NEG  | NEG  | NEG  | NEG         | NEG  | NEG | NEG  | NEG  | NEG  |
| 20      | NEG          | 232% | NEG | NEG  | NEG  | NEG  | NEG         | 321% | NEG | NEG  | NEG  | NEG  |
| 21      | NEG          | NEG  | NEG | NEG  | NEG  | NEG  | NEG         | NEG  | NEG | NEG  | NEG  | NEG  |
| 22      | NEG          | NEG  | NEG | NEG  | NEG  | NEG  | NEG         | NEG  | NEG | NEG  | NEG  | NEG  |
| 23      | NEG          | NEG  | NEG | NEG  | NEG  | NEG  | NEG         | NEG  | NEG | NEG  | NEG  | NEG  |
| 24      | NEG          | NEG  | NEG | NEG  | NEG  | NEG  |             |      |     |      |      |      |
| 25      | NEG          | NEG  | NEG | NEG  | NEG  | NEG  | NEG         | NEG  | NEG | NEG  | NEG  | NEG  |
| 26      | NEG          | 35%  | NEG | NEG  | NEG  | NEG  |             |      |     |      |      |      |
| 27      | NEG          | NEG  | NEG | NEG  | NEG  | NEG  | NEG         | NEG  | NEG | NEG  | NEG  | NEG  |
| 28      | NEG          | NEG  | NEG | 163% | NEG  | NEG  | NEG         | NEG  | NEG | 133% | NEG  | NEG  |
| 29      | NEG          | 78%  | NEG | NEG  | 37%  | 44%  | NEG         | 81%  | NEG | NEG  | NEG  | NEG  |
| 30      | 38%          | 91%  | NEG | NEG  | NEG  | NEG  | 51%         | 77%  | NEG | NEG  | NEG  | NEG  |
| 31      | 37%          | 34%  | NEG | NEG  | NEG  | NEG  | NEG         | NEG  | NEG | NEG  | NEG  | NEG  |
| 32      | NEG          | NEG  | NEG | NEG  | NEG  | NEG  |             |      |     |      |      |      |
| 33      | NEG          | NEG  | NEG | NEG  | NEG  | NEG  | NEG         | NEG  | NEG | NEG  | NEG  | NEG  |
| 34      | NEG          | NEG  | NEG | NEG  | NEG  | NEG  | NEG         | NEG  | NEG | NEG  | NEG  | NEG  |
| 35      | NEG          | NEG  | NEG | NEG  | NEG  | NEG  |             |      |     |      |      |      |
| 36      | NEG          | 56%  | NEG | 132% | 39%  | NEG  | 93%         | 92%  | NEG | 138% | 98%  | NEG  |
| 37      | 48%          | 47%  | 36% | NEG  | NEG  | NEG  |             |      |     |      |      |      |
| 38      | EC           | EC   | EC  | EC   | EC   | EC   |             |      |     |      |      |      |
| 39      | NEG          | NEG  | NEG | NEG  | 63%  | 41%  | NEG         | NEG  | NEG | NEG  | 73%  | NEG  |
| 40      | NEG          | NEG  | NEG | NEG  | NEG  | NEG  |             |      |     |      |      |      |
| 41      | NEG          | 41%  | NEG | NEG  | NEG  | NEG  | 60%         | 60%  | NEG | 63%  | 68%  | NEG  |
| 42      | NEG          | NEG  | NEG | NEG  | NEG  | NEG  | NEG         | NEG  | NEG | NEG  | NEG  | NEG  |
