# Supplementary material
Source: PubMed Central journal article supplement (PMC5444521)

Suppl. Figure 1

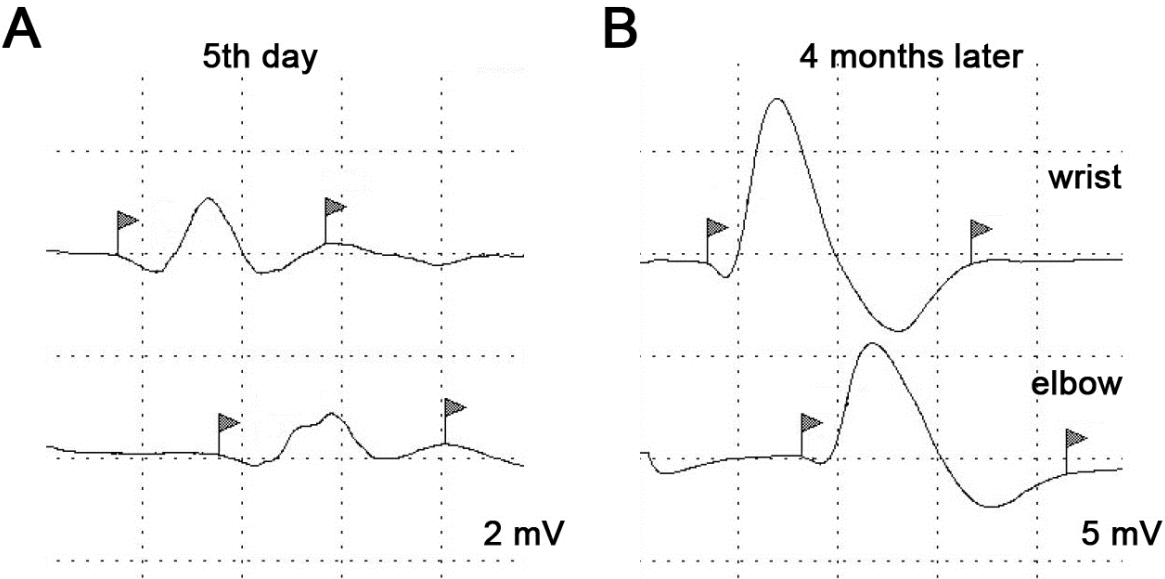

Supplement: NIHMS72373-supplement-Suppl__Figure_1.pdf [file NIHMS72373-supplement-Suppl__Figure_1.pdf]

Suppl. Figure 2

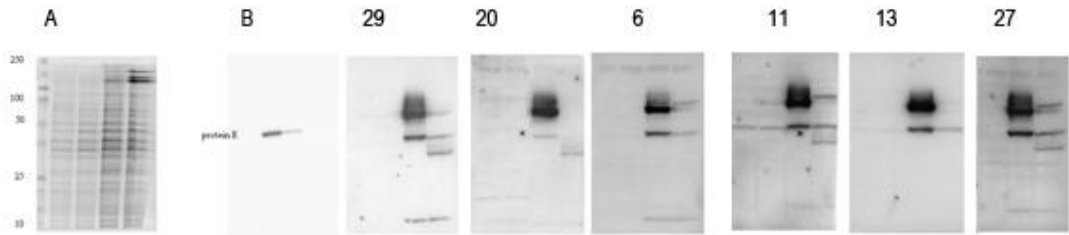

Supplement: NIHMS72373-supplement-Suppl__Figure_2.pdf [file NIHMS72373-supplement-Suppl__Figure_2.pdf]

Suppl Figure 3

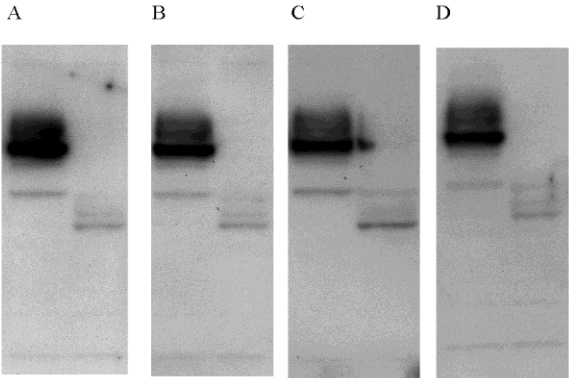

Supplement: NIHMS72373-supplement-Suppl__Figure_3.pdf [file NIHMS72373-supplement-Suppl__Figure_3.pdf]

Suppl Figure 4

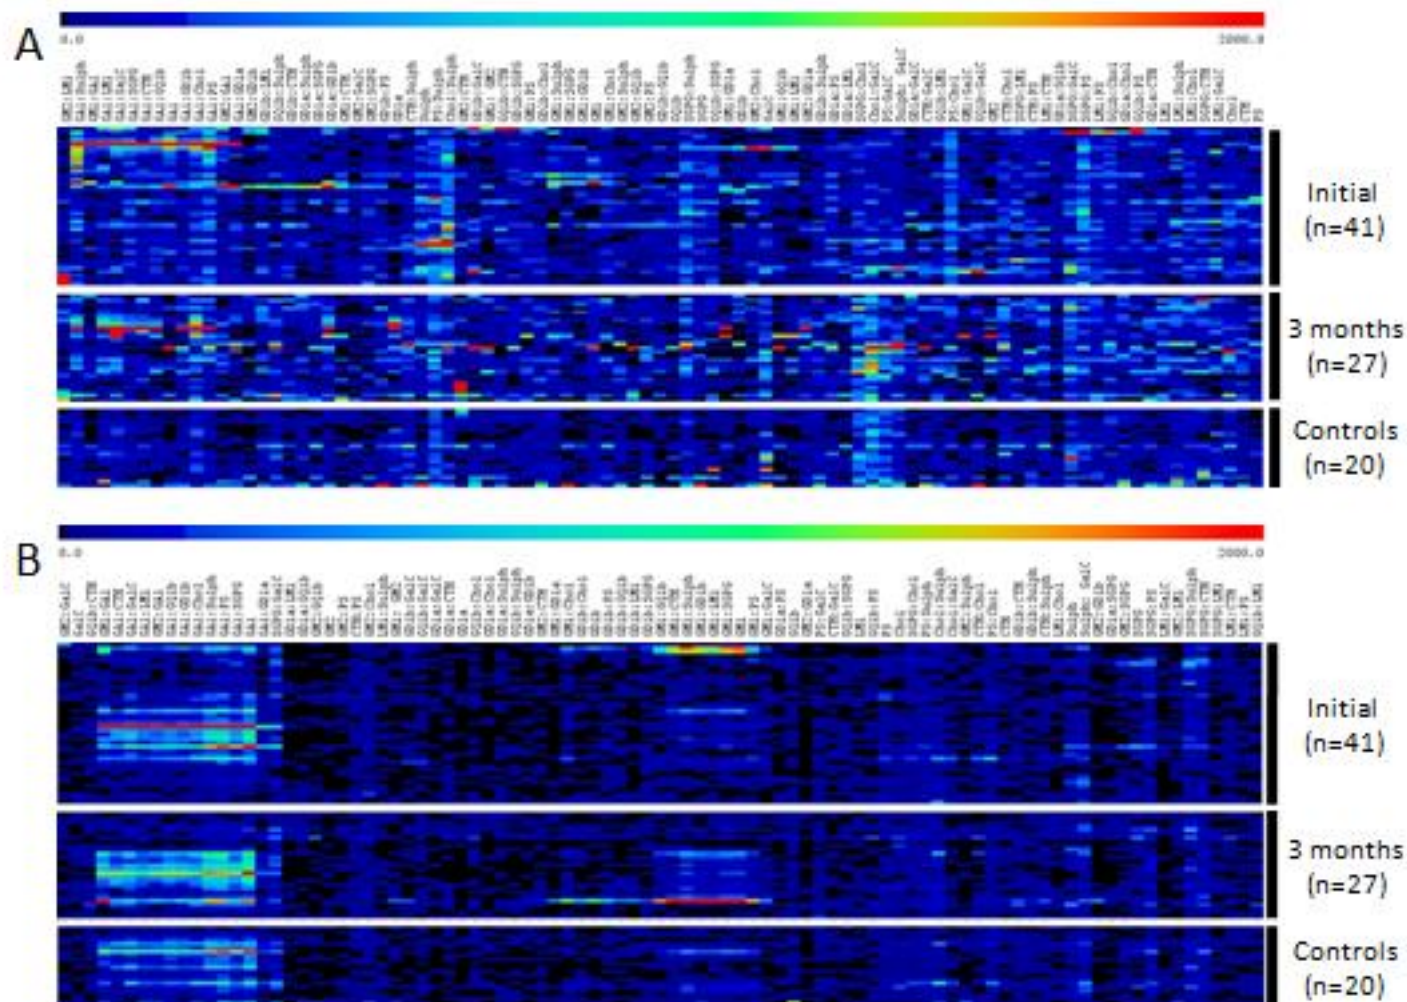

Supplement: NIHMS72373-supplement-Suppl__Figure_4.pdf [file NIHMS72373-supplement-Suppl__Figure_4.pdf]
